# Supplementary material for: Genomic Sequencing of Japanese Plum (Prunus salicina Lindl.) Mutants Provides a New Model for Rosaceae Fruit Ripening Studies
Source: Front Plant Sci. 2018 Feb 19;9:21. doi: 10.3389/fpls.2018.00021 (PMC5825990; doi:10.3389/fpls.2018.00021)
Supplement: Supplementary Table 2 — Summary of the unique variants effects (SNP/INDEL) for each of the plum cultivars. [file Table2.xlsx]

## Sheet: Supplemental Table 2
Suplemental Table 2. Summary of the unique variants effects (SNP/INDEL) for each of the plum cultivars.
	CULTIVAR (Total SNPs/INDELS)
Variant effect	JSR (5,496/2,714)	CASSELMAN (5,718/2,855)	SM (4,122/2,189)	LSR (3,259/1,905)	ROYSUM (3,933/2,361)	SR (5,114/2,571)
missense_variant	1942/839	1980/871	1447/669	1058/561	1393/728	1868/789
synonymous_variant	1218/143	1221/138	875/91	688/65	826/113	1097/118
5_prime_UTR_variant	652/601	687/598	512/475	441/468	497/503	628/554
5_prime_UTR_premature_start_codon_gain_variant	114/29	142/32	97/27	81/21	86/21	120/23
intron_variant	299/117	351/143	224/123	180/86	226/105	255/120
3_prime_UTR_variant	1128/726	1200/787	863/593	733/532	827/669	1025/712
stop_gained	49/21	37/14	29/7	28/13	22/15	40/18
splice_region_variant&synonymous_variant	13/0	18/2	13/0	7/2	11/2	11/1
splice_region_variant	23/10	21/9	16/11	12/12	12/11	15/12
upstream_gene_variant	4/6	7/9	6/6	4/5	6/4	10/7
missense_variant&splice_region_variant	29/9	23/8	20/3	10/3	12/5	20/7
start_lost	5/4	2/1	0/2	1/0	1/2	2/3
splice_region_variant&intron_variant	11/2	8/8	5/11	9/7	6/6	11/4
splice_donor_variant&intron_variant	1/1	2/0	4/2	2/1	2/2	1/3
stop_gained&splice_region_variant	1/0	3/0	2/0	1/0	1/0	0/0
stop_retained_variant	3/0	3/0	0/0	0/0	1/0	0/0
splice_acceptor_variant&intron_variant	1/0	4/1	3/0	1/2	1/0	2/0
start_lost&splice_region_variant	1/0	0/0	0/0	0/0	0/0	1/0
initiator_codon_variant	1/0	1/1	0/0	0/0	0/0	0/0
stop_lost	1/0	3/4	3/1	3/1	0/1	5/1
stop_lost&splice_region_variant	0/0	4/0	1/2	0/1	2/1	3/2
downstream_gene_variant	0/0	1/0	1/4	0/0	0/4	0/0
splice_region_variant&stop_retained_variant	0/0	0/0	1/0	0/0	1/0	0/0
